# Supplementary material
Source: PubMed Central journal article supplement (PMC6374260)
Supplement: 11606_2018_4736_MOESM1_ESM.pdf [file 11606_2018_4736_MOESM1_ESM.pdf]

## APPENDIX

### Contents:

- **Appendix Table 1:** Healthy Michigan Plan Enrollee Interviewee Characteristics
- **Appendix Figure 1:** Healthy Michigan Plan Enrollee Survey Responses Flowchart
- **Appendix Table 2:** Characteristics of Enrollee Survey Respondents and Nonrespondents
- **Appendix Table 3:** Employment Status among Healthy Michigan Plan Enrollees, by Health Status and Presence of Chronic Health Condition
- **Appendix Methods:** Interview Participant Recruitment

**Appendix Table 1. Healthy Michigan Plan Enrollee Interviewee Characteristics**

| <b>Interviewee Characteristics*</b>        | <b>N=67<br/>n (%)</b> |
|--------------------------------------------|-----------------------|
| <b>Age group</b>                           |                       |
| 19-34                                      | 17 (25)               |
| 35-50                                      | 15 (22)               |
| 51-64                                      | 33 (49)               |
| 65                                         | 2 (3)                 |
| <b>Gender</b>                              |                       |
| Male                                       | 23 (34)               |
| Female                                     | 44 (66)               |
| <b>Race/Ethnicity</b>                      |                       |
| White                                      | 34 (51)               |
| African American                           | 24 (36)               |
| Hispanic/Latino                            | 4 (6)                 |
| Native American                            | 5 (8)                 |
| <b>Income (% of Federal Poverty Level)</b> |                       |
| 0-35% FPL                                  | 25 (37)               |
| 36-99% FPL                                 | 16 (24)               |
| 100-133% FPL                               | 22 (33)               |
| Unknown %FPL                               | 4 (6)                 |
| <b>Urban/Rural</b>                         |                       |
| Urban                                      | 53 (79)               |
| Rural                                      | 14 (21)               |

\*All attributes are based on self-report at the time of the interview; the MDHHS Data Warehouse was used after interviews to confirm income and HMP enrollment.

Appendix Figure 1. Healthy Michigan Plan Enrollee Survey Responses Flowchart

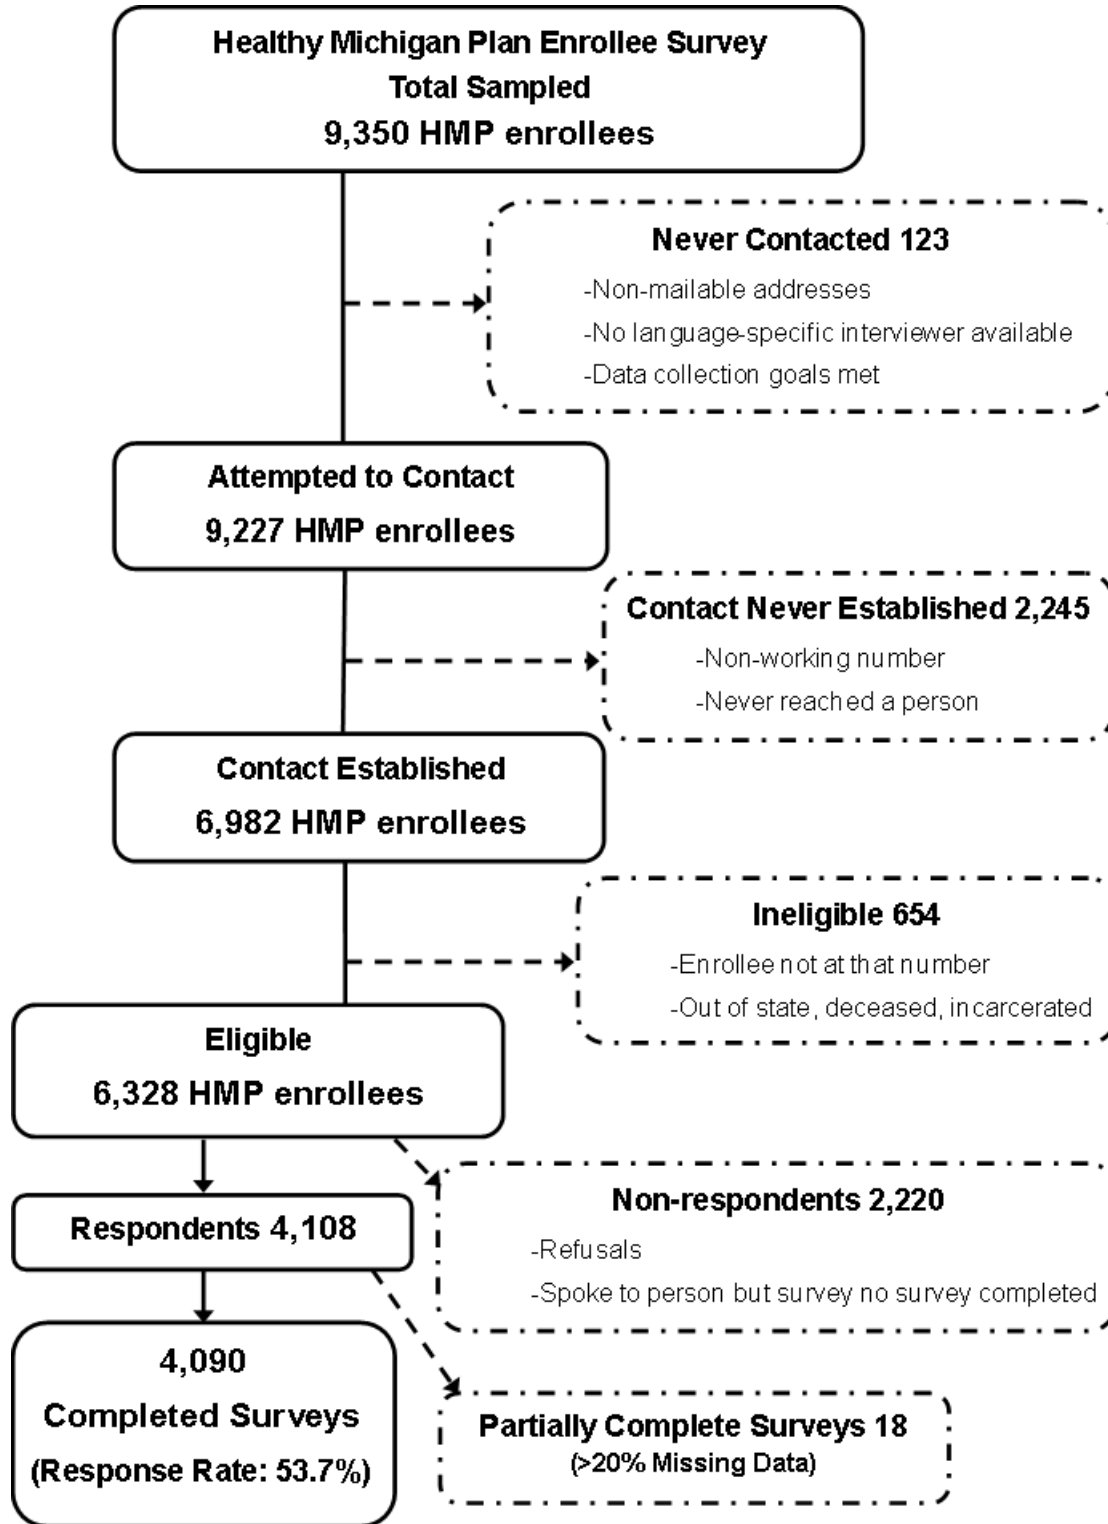

**Appendix Table 2.** Characteristics of Enrollee Survey Respondents and Nonrespondents

| <b>Interviewee Characteristics</b>         | <b>Respondents<br/>N=4,090<br/>n (%)</b> | <b>Nonrespondents<br/>N=2,220<br/>n (%)</b> | <b>p value</b> |
|--------------------------------------------|------------------------------------------|---------------------------------------------|----------------|
| <b>Age group</b>                           |                                          |                                             |                |
| 19-34                                      | 31.8                                     | 39.7                                        | <0.0001        |
| 35-50                                      | 31.8                                     | 31.4                                        |                |
| 51-64                                      | 36.4                                     | 28.9                                        |                |
| <b>Gender</b>                              |                                          |                                             |                |
| Male                                       | 41.1                                     | 48.3                                        | <0.0001        |
| Female                                     | 58.9                                     | 51.7                                        |                |
| <b>Income (% of Federal Poverty Level)</b> |                                          |                                             |                |
| 0-35% FPL                                  | 39.1                                     | 38.5                                        | 0.80           |
| 36-99% FPL                                 | 35.5                                     | 36.3                                        |                |
| 100-133% FPL                               | 25.4                                     | 25.2                                        |                |
| <b>Geographic Region</b>                   |                                          |                                             |                |
| Northern Michigan                          | 18.2                                     | 17.3                                        | 0.0001         |
| Central Michigan                           | 30.9                                     | 27.7                                        |                |
| Southern Michigan                          | 20.5                                     | 19.1                                        |                |
| Detroit Metro                              | 30.4                                     | 35.9                                        |                |

**Appendix Table 3. Employment Status among Healthy Michigan Plan Enrollees, by Health Status and Presence of Chronic Health Condition**

| Employment Status      | Weighted % |                               |              |                |                                  |       |                |
|------------------------|------------|-------------------------------|--------------|----------------|----------------------------------|-------|----------------|
|                        | TOTAL      | Health Status                 |              |                | Chronic Health Condition Present |       |                |
|                        |            | Excellent, Very Good, or Good | Fair or Poor | <i>p</i> value | No                               | Yes   | <i>p</i> value |
| Employed/Self-employed | 48.9%      | 56.1%                         | 32.3%        | <0.001         | 59.8%                            | 44.1% | <0.001         |
| Out of Work            | 27.6%      | 26.0%                         | 31.3%        |                | 23.3%                            | 29.5% |                |
| Unable to Work         | 11.2%      | 4.2%                          | 27.8%        |                | 2.2%                             | 15.3% |                |
| Retired                | 2.5%       | 2.7%                          | 2.0%         |                | 1.8%                             | 2.8%  |                |
| Student                | 5.2%       | 6.0%                          | 3.3%         |                | 8.0%                             | 3.9%  |                |
| Homemaker              | 4.5%       | 5.0%                          | 3.4%         |                | 5.0%                             | 4.3%  |                |

## **Appendix Methods: Interview Participant Recruitment**

Interview participants were recruited through community outreach efforts guided by a statewide community advisory board. We used advertisements in newspaper and online venues such as Craigslist, as well as flyers posted at federally qualified health centers (FQHCs) and other safety net clinics, public libraries, and community-based organizations. We also distributed recruitment materials with community health workers, navigators, certified application counselors and community leaders in our five target geographic regions. A secure toll-free phone number and email address were provided on recruitment materials for interested individuals to voluntarily call and leave a voicemail or e-mail with their contact information. Study team members contacted those who indicated interest to screen them for eligibility.
